# Supplementary material for: Genome-Wide Survey of the RWP-RK Gene Family in Cassava (Manihot esculenta Crantz) and Functional Analysis
Source: MDPI journal article supplement (doi:10.3390/ijms241612925), 2023-08-18
Supplement: s1 [file s1]

Supplementary data 1. RWP-RK protein sequences used for phylogenetics and motif analyses.

>AtNLP1

MEDDGGSDGGEGNGGFSPNSSFGAFADTAMDLD FMD ELLFDGCWLETTDSKSLKQTEQSPSASTA  
MNDNSPFLCFGENPSQDNFSNEETERMFPQAEKFLLEEAEVGKSWWIAPSASEGPSSSVKERLLQAIS  
GLNEAVQDKDFLVQIWVPIQQEGKSFLT TWAQPHLFNQEYSSLAEYRHVSETYNFPADDEGMKDFVG  
LPGRVFLQKFPEWTPDVRFFRRDEYPRIKEAQKCDVRGSLALPVFERGSGTCLGVVEIVTTTQKMNYR  
QELEKMCKALEAVDLRSSSNLNTPSSEFLQVYSDFYCAALPEIKDFLATICRSYDFPLALSWAPCARQG  
KVGSRHSDENFSECVSTIDSACSVPEQSKSFW EACSEHLLQGEGIVGKA FEATKLFFVPEVATFSKT  
NYPLAHHAKISGLHAALAVPLKSKSGLVEFVLEFFFPKACLDTEAQQEMLKSLCVTLQQDFRSSNLFIK  
DLELEVLPVRETMLFSENLLCGAETVESL TEIQMQESSWIAHMIKANEEKGKDVLSWEYQKEDPKELS  
SGRENSQLDPVPNNVPLEAEQLQQASTPGLRVDIGPSTESASTGGGNMLSSRRPG EKKRAKTEKTIGL  
EVL RQYFAGSLKDAAKSIGVCPTTLKRICRQH GIMRWPSRKIKKVGHSLKKLQLVMDSVQGAQGSIQ L  
DSFYTSFPELNSP NMSSNGPSLKSNEQP SHLNAQTDNGIMAEENPRSPSSSSCKSSGSSNNNNTG  
NILVAEDADAVLKRAHSEAQLHNVNQEETKCLARTQSHKTFKEPLVDN SSPLTGSSNTSLRARGAIK  
VKATFGEARIRFTLLPSWGF AELKQEIARRFNIDDISWFDLKYLD DDK E WVLLTCEADLVECIDYRLTQT  
HTIKISLNEASQVKLSGSFGNTGLS

>AtNLP2

MEGGRGGGDGNFLPNSNFGVFSDSAMDMD FMD ELLFDGCWLETTDGKSLKQTMGQQVSDSTTM  
NDNNNNSYLYGYQYAENLSQDHISNEETGRKFPIPPGFLKIEDLSNQVPFDQSAVMSSAQAEKFLLE  
ESEGGRRYWIAPRTSQGPSSSVKERLVQAIEGLNEEVQDKDFLIQIWLPIQQEGKNFLT TSEQPHFFNP  
KYSSLKRYRDVSVAYNFLADEDSKESVGLPGRVFLKKLPEWTPDVRFFRSE EYPRIKEAEQCDVRGSLAL  
PVFERGSGTCLGVVEIVTTTQKMNYRPELDNICKALESVNLRSSRSLNPPSREFLQVYNEFYAALPEVS  
EFLTLCRVYDLPLALTWAPCARQ GKVGSRHSDENFSECVSTVDDACIVPDHQSRHFLEACSEHLL  
QGEGIVGKA FNATKLFFVPEVTTFSKTNYPLAHHAKISGLHAALAVPLKNKFNSSVEFVLEFFFPKACL  
DTEAQQDMLKSLSATLQQDFRSLNLFIDKELEVVFPVREEVFAENPLINAGTGEDMKPLPLEEISQ  
EDSSWISHMIKANEEKGKGVSLSWEYQKEEPKEEFMLTSGWDNNQIGSGHNNFLSEAEQFQKVTNSG  
LRIDMDPSFESASFGVGQTLLGSRRPGEKRRTKTEKTIGLEVLRQYFAGSLKDAAKSIGVCPTTLKRICR  
QHGITRWPSRKIKKVGHSLKKLQLVIDSVQGVQGSIQ LDSFYTSFPELSSPHMSGTGT SFKNPNAQT  
ENGVSAQGTAAAPKSPSSSSSHSGSSTCCSTGANQSTNTGTTSNTVTTLMAENASAILKRARSEV  
RLHTMNQDETKSLRSLSHKTFSEHPLFENPPRLPENSSRKLKAGGASKV/KATFG EAKVRFTLLPTWGF  
RELQHEIARRFNIDNIAPFDLKYLD DDK E WVLLTCEADLEECIDIYRSSQSRTIKISVHEASQVKLGGSFG  
SIGLGPSL

>AtNLP3

MVGPFKKILHAHNQRFPPSSSSSLDPVDDSSRKQTRILSYLLHLSLSLHITYSLCLLHFFFGSSNPFSP  
MEESNNSAVVD FPDNFMDQLLWEECWEE EATQHDQALSSPSGLKERVACAMGHLQEV MGERELLI  
QLWVPVETRSGRVLSTEEQPY SINTFSQSQSLALYRDASAGYSFAAEVGSEQLVGLPGRVFLRRMPE  
WTPDVRFFRKEEYPRIGYARRYQVRATLALPLFQGTSGNCVAVMEMVTTHRNLEYASQLSTICHALEA  
FDLRTSQT SIVPASLKV TSSSSSSSRTEVASILQGICSSHGLPLAVTWGHQDSSSCLSALISASYAADHG  
SRCFLAACSEHLLGGEG IAGRAFATKKQCFATDVAIFSKWSYPLSHYAKMFDLHAALAVPILTRGN  
RTVQFVLELFFPRDCLDIQTHSLTASQLKRFQSSPHLMVDDNQIAEEVRDAATPPLTQEDPKGKQV  
SFSFSSASSLENRKRKTKAEKDITLTLRQH FAGSLKDAAKNIGVCPTTLKRICRQNGISRWPSRKIKKV  
GHSLRKLQVVMDSVEGVQGS LHLASFYSSFPQLQSSSSSSFPFINPTQTVHVPPKSPSSSSGSQSSSGS  
STCCSSEEQQLGGFQKPALSHPQLLLSSMHEDQRPVRVTSSLPPLPSATTPRKAKDGMKVKAMFGD

SMLRMSLLPHSRLTDLRREIAKRFGMDDVLRSNFSLKYLDDDQEWVLLTCDADLEECIQVYKSSSLKET  
IRILVHHPLSRPSFGS

>AtNLP4

MEDSFLQSENVVMDADFM DGLLLDGCWLETTD GSEFLNIAPSTSSVSPFDPTSMWWSPTQDTSALC  
TSGVVSQMYGQDCVERSS LDEFQWNKRWWIGPGGGGSSVTERLVQAVEHIKDYTTARGSLIQLWV  
PVNRGGKRVLT TKEQPFSDPLCQRLANYREISVNYHFSAEQDDSKALAGLPGRVFLGKLPWTPDV  
RFFKSEEPVPRVHHAQDCDVRGTLAIPVFEQGS KICLGVIEWMTTEMVKLRPELESICRALQAVDLRSTE  
LPIPPSLKGCDSL SYKAALPEIRNLLRCACETHKLPLAQTWVSCQQQNKSGCRHNDENYIHCVSTIDDA  
CYVGDPTVREFHEACSEHLLKGQGVAGQAFLTNGPCFSSDVSNYKKSEYPLSHHANMYGLHGAVA  
IRLRCIHTGSAD FVLEFFLPKDCDDLEEQRKMLNALSTIMAHVPRSLRTVTDKELEEESEVIEREEIVTPKI  
ENASELHGNSPWNASLEEIQRSNNTSNPQNLGLVFDGGDKPNDGFG LKRGFDYTMDSNVNESSTF  
SSGGFSMMAEKKRTKADKTITLDVLRQYFAGSLKDAAKNIGVCPTTLKRICRQHGIQRWPSRKIKKVG  
HSLQKIQRVIDSVQGVSGPLPIGSFYANFPNLVSQSQEPSQQA KTTPPPPPVQLAKSPVSSYSHSSN  
SSQCCSSETQLNSGATDPPSTDVGGALKKTSSEIELQSSSLDETILTSSLENIPQGTNLLSSQDDDFLR  
IKVSYGEEKIRLRMRNSRRLRDLLWEIGKRF SIEDMSRYDLKYLDEDNEWVLLTCDDEDVEECVDVCR TT  
PSHTIKLLLQASSHHFPERSSATEYSLWH

>AtNLP5

MENNSLPM DPAMDSSFMDGLLLEG CWLETTDASEFLNFSPSTSVAPFDPSSFMWWSPTQDTSNLSLQ  
MYGQDCPERSSLEDQNQGRDLSTFNRRWWIGPSGHHGFSVMERLVQAVTHIKDFTSERGSLIQLW  
VPVDRGGKRVLT TKEQPFSDPMCQRLAHYREISENYQFSTEQEDSDSSSRDLVGLPGRVFLGKVPE  
WTPDVRFFKNEEPVPRVHAQDCDVRGTLAIPVFEQGSQICLGVIEWMTTQMVKLSPDLESICRALQ  
AVDLRSTEIPIPPSLKGPDFS YQAALPEIRNLLRCACETHKLPLAQTWV SCLKQSKTGCRHNDENYIHC  
VSTIDDACYVGDPTVREFHEACSEHLLKGQGVVGEAFLTNGPCFSSDVSSYKKSEYPLSHHATMFGL  
HGTVAIRLCIHTGSVD FVLEFFLPKNCRDIEEQRKMLNALSTIMAHVPRSLRTVTQKELEEEGDSMVS  
EVIEKGVTL PKIENTTEVHQ SISTPQNVGLVFDGGTTEMGELGSEYGKGVSVNENNTFSSASGFNRVTE  
KKRTKA EKNITLDVLRQYFAGSLKDAAKSIGVCPTTLKRICRQHGIQRWPSRKIKKVGHSLQKIQRVIDS  
VEGVSGHHLP IGSFYASFPNLAASPEASSLQQQSKITTFLSYSHSPPAKSPGSSCSHSSSCSSETQVIKE  
DPTDKTRLVSR SFKETQTTHLSPSSQEDDFLRVKVSYEE EKIRFKMRNSHRLKDLLWEIAKRF SIEDV  
SRYDLKYLDEDNEWVLLRCDDDVEECVDVCRSFPGQTIKLLLQLSSSYLPERSSVSGCLS

>AtNLP6

MELDDL DLSGSWPLDQITFASNFKSPVIFSSSEQPFSPLWSFSETSGDVGGELYSAAVAPTRFTDYSV  
LLASSESETTTKENNQVPSPSWGIMPLENPD SYCAIKAKMTQALRYFKESTGQQHVLAQVWAPVKN  
RGRYVLTTS GQPFVLGPNSNGLNQYRMVSLTYMFSLDGERDGELGLPGRVFRKKLPEWTPNVQYYSS  
KEFSRLGHALHYNVQGTALP VFEP SRQLCVGVVELIMTSPKINYAPEVEKVKCALEAVNLKTSEILNHE  
TTQICNEGRQNALAEILEITVVCETYKLPLAQTWVPCRHRSVLAFGGGFKKSCSSFDGSCMGKVCMS  
TSDLAVYVVD AHWVGFRDACAEHHLQKGQGVAGRAFQSGNLCFCRDVTRFCKTDYPLVHYARMF  
KLTSCFAVCLKSTYTG DDEYVLEFFLP PAITDKSEQDCLLGSLLQTMKQHYSSLKVSETELCENNMSLE  
VVEASEDGMVYSKLEPIRIHHPAQISKDYELNAPEQK VSLNSDFMENNEVDDGVERFQTL DPIPEAK  
TVKKSERKRGKTEKTISLEVLQQYFAGSLKDAAKSLGVCPTTMKRICRQHGISRWPSRKINKVNRSLTRL  
KHVIDSVQGADGSLNLTSLSPRPWPHQIPPIDIQLAKNCPPTSTSPLSNLQDVKIENRDAEDSAGSSTS  
RASCKVNPICETRFR LPTHNQEPSRQVALDDSDSSSKNMTNFWAHLTCQDTASPTILQHKLVS IKATY  
REDIIRFKISPESV SITELKQQVAKRLKLETA AFELKYLDDDREWVSVSCDADLSECLD TSAAKANTL  
RLSVHDVTFNFGSSCESSEETMMCL

>AtNLP7

MCEPDDNSARNGVTTQPSRSRELLMDVDDLDLDGSWPLDQIPYLSSSNRMISPIFVSSSSEQPC SPL  
WAFSDGGGNGFHHATSGGDDEKISSVSGVPSFRLAEYPLFLPYSSPSAAENTTEKHNSFQFPSPLMSL  
VPPENTDNYCVIKERMTQALRYFKESTEQHVLAQVWAPVRKNGRDLLTTLGQPFVLNPNNGNLNQ  
YRMISLTYMFSVDSESDVELGLPGRVFRQKLPEWTPNVQYYSSKEFSRLDHALHYNVRGTLALPVFNP  
SGQSCIGVVELIMTSEKIHYAPEVDKVCKALEAVNLKSSEILDHQTQICNESRQNALAEILEVLTVVCE  
THNLPLAQTWVPCQHGSVLANGGGLKKNCTSF DGSCMGQICMSTTDMACYVVD AHVWGFRDAC  
LEHHLQKGQGVAGRAFLNGGSCFCRDITKFKCTQYPLVHYALMFKLTCFAISLQSSYTGD DSYILEFF  
LPSSITDDQEQLLLGSILVTMKEHFQSLRVASGVDFGEDDDKLSFEIIQALPDKKVH SKIESIRVPFSGF  
KSNATETMLIPQPVVQSSDPVNEKINVATVNGVVKEKKKTEKKRGKTEKTISLDVLQQYFTGSLK DAAK  
SLGVCPTTMKRICRQHGISRWPSRKIKKVNRSITKLKR VIESVQGT DGGLDLSMAVSSIPWTHGQ TSA  
QPLNSPNGSKPELPNTNNSPNHWSSDHSPNEPNGSPELPPSNGHKRSRTVDESAGTPTSHGSCDG  
NQLDEPKVPNQDPLFTVGGSPGLLFPYSRDHVSAASFAMPNRLLGSIDHFRGMLIEDAGSSKDLR  
NLCPTAAFDDKFQDTNWMNNDNNSNNNLYAPPKEEAIANVACEPSGSEMRTVTIKASYKDDIIRFRI  
SSGSGIMELKDEVAKRLKVDAGTFDIKYLDDDN EWWVLIACDADLQECLEIPRSSRTKIVRLLVHDVTTN  
LGSSCESTGEL

>AtNLP8

MENPFASREKFGNYSDFPTEQMDGLSSNFGSGVRNLISDDMFNPSSSELMNFDSLAAWCN SPSAT  
DILFAQYGLSNSQPMPGAFTSFHVADPKATSLTRSYDLESSYYGEERSSAQEMNSQFHRSSDDEL  
SGKRRKVVNQKIGFPNVLNCTIPRSLSHSLDEKMLKALS LFMESSGSGEGILAQVWTPIKTGDQYLLST  
CDQAYLLDPRFSQYREVSRRFTFAAEANQCSFPGLPGRVFISGVPEWTSNVMYYKTDEYLRMKHAID  
NEVRGSIAIPILEASGTSCCAVMELVTSKEKPNFDMEMDSVCRALQAVNLRTAAIPRPQYLSSSQ RDA  
LAEIQDVLRTVCHAHKLPLALAWIPCRKDQSIRVSGQKSGENCILCIEETACYVNDMEMEGFVHACLE  
HCLREKEGIVGKAFISNQPFSSDVKAYDISEYPIVQHARKYGLNAAVAIKLRSTYTGEDDYILELFLPVS  
MKGSLEQQLLLDLSLGMTQRICRTLRTVSEVGSTKKEG TKPGRSSDMSNFPQTTSSENFQTISLDSE  
FNSTRSMFSGMSSDKENSITVSQGTLEQDVSKARTPEKKKSTTEKNVSLSALQQHFSGSLKDAAKSLG  
GETSAYFQAWVYFFCPTTLKRICRQHGIMRWPSRKINKVNRSLRKIQTVLDSVQGV EGGKLFDSATGE  
FIAVRPFIQEIDTQKGLSSLDNDAHARRSQEDMPDDTSFKLQEAKSVDNAIKLEEDTTMNQARPGSF  
MEVNASGQPWAWMAKESGLNGSEGIKSVCNLSSVEISDGM DPTIRCSGSIVEPNQMSMCSISDSSN  
GSGAVLRGSSSTSMEDWNQMRTHNSNSSESSTTLIVKASYREDTVRFKFEP SVGCPQLYKEVGKRF  
KLQDGSFQLKYLDDEEEWVMLVTDSDLQECLEILHGMGKHSVKFLVRDLSAPLGSSGGSNGYLGTGL

>AtNLP9

MENPSASRDNKGFCFPDIPVEEMDGWVKNLISEEDMFSSSSTSELMNFESFASWCN SPSAADILFTQ  
YGLSTSQSIIPFGGLEGSYACEKRPLDCTSVPRSLSHSLDEKMLKALS LFMESGEGILAQFWTPIKTGD  
QYMLSTCDQAYLLDSRLSGYREASRRFTFSAEANQCSYPGLPGRVFISGVPEWTSNVMYYKTA EYLR  
MKHALDNEVRGSIAIPVLEASGSSCCAVLELVTCREKPNFDVEMNSVCRALQAVNLQTSTIPRRQYLS  
SNQKEALAEIRDVLRAVCYAHRLPLALAWIPCSYSKGANDELVKVYGKNSKECSLLCIEETSCYVNDM  
EMEGFVNACLEHYLREGQGIVGKALISNKPFSSSDVKTFDICEYPLVQHARKFGLNAAVATKLRSTFT  
GDNDYILEFFLPVSMKGSSEQQLLLDLSLGMTQRLCRTLKTVSDAESIDGTEFGSRSVEMTNLPQATV  
SVGSFHTTFLD TDVNSTRSTFSNISSNKR NEMAGSQGT LQQEISGARRLEKKKSSTEKNVSLNVLQQY  
FSGSLKDAAKSLGVCPTTLKRICRQHGIMRWPSRKINKVNRSLRKIQTVLDSVQGV EGGKLFDSVTGE  
FVAVGPFIQEFGTQKSLSSHDEDALARSQGDMDDEDVSVEPLEVKSHDGGGVKLEEDVETNHQAGPG  
SLKKPWTWISKQSGLIYSDDTDIGKRSEEVNKDKEDLCVRRCLSSVALAGDGMNTRIERGNGTVEPN  
HSISSMSDSSNSSGAVLLGSSSASLEQNWNQIRTHNNSGESGSSSTLTVKATYREDTVRFKLDPYV V  
GCSQLYREVAKRFLQEGAFQLKYLDDEEEWVMLVTDSDLHECFEILNGMRKHTVKFLVRDIPNTAM

GSSAGSNGYLGTGT

>AtRKD1

MKSFCCKLEYDQVFGKENNSFSFLNHSSLYSHQSELANPFFELEDEMLPSATSSNCFTSASSFLALPDLE  
PISIVSHEADILSVYGSASWTAETMFVSDFAKKSETTTTCKRRCREECFSSCSVSKTLSKETISLYFYPIT  
QAARELNIGLTLKKRCRELGIKRWPHRKLMSLQKLISNVKELEKMEGEENEDKLRNALEKL  
EKEKKTIEKLPDLKFEDKTKRLRQACFKANHKRRSGMSTPITSSSSSASASSSSYSSVSGFER

>AtRKD2

MADHTTKEQKSFSFLAHSPSFDHSSLSYPLFDWEEDLLALQENSGSQAFPFTTSLPLPDLEPLSEDVL  
NSYSSASWNETEQNRGDGASSEKKRENGTVKETTCKRKINERHREHSVRIISDITTYTTSSAPTLSKET  
VSRFYFYPITQAAIALNVGLTLLKRRCRELGIRRWPHRKLMSLNTLISNVKELQKMEGEENAEKLQDAL  
EMLEKEKRTIEDLPDLEFKDKTKRLRQACFKANHKRKKRSLKSDQSQVPSCSSSGSVPSDES  
DEAGMESDEEMKYLLCGFSSEFTSGL

>AtRKD3

MADQRPLMTWLEANNYESFLQEDIFSFLDQSLFVDPHSSFIDPFKDFQTQNWFSLQDSIVNHISTTFA  
ADHTFLASLDLEAISSTFSLDISSGWWNENNGNYNNQVEPNLDEISRTNTMGDPNMEQILHEDVNT  
MKEKTSQKRIIMKRRYREDGVINNMREMMKQFYFYPITKAAKELNIGVTLLKKRCRELGIWRPHRKL  
LTSLNALIANLKDLLGNTKGRTPKSKLRNALELLEMEKKMIEEVPDLEFGDKTKRLRQACFKAKYKRRRL  
FSSSS

>AtRKD4

MSSSKHSSVFNYLSALFLSLFLQQMDQNSLHHLDSPKIENEYEPDSLYDMLDKLPPLDSLDMEDLKP  
AGLHFQFHYSNFEDFFENIEVDNTIPSDIHLTQEPYFSSDSSSSSPLAIQNDGLISNVKVEKVTVKKR  
NLKKKRQDKLEMSEIKQFFDRPIMKAAKELNVGLTVLKKRCRELGIYRWPHRKLKSLNSLIKLNKNVGM  
EEEVKNLEEHRFLIEQEPDAELSDGTTKLRQACFKANYKRRKSLGDDYY

>AtRKD5

MVDQGGFTLKKKKKNILKLFYVKILGFCFCDSWSSSDMAHSLTSLAVFQSVIRKEMVRSLSHVYESV  
EIEREFWFKSKSCYVEKKAKPLFRSEDFRRPEISEGSVFGTWRCIFVFRFNHSLPRFPTLLCLSRNPK  
LEDIPNLANELKFISELKPSKIYEEEQCSSSTEGYNSDLPKPRKLVLKQDLNCLPDSETESEESVNE  
KTEHSEFENDKTEQSEDAKTEILKKKKRTPSRHVAELSLEELSKYFDLTIVEASRNKLVGLTVLKKK  
CREFGIPRWPHRKLKSLDCLIHDLQREAEKQKEKNEAAAMAVAKKQEKLETEKRNIVKRPFMEIGIET  
KKFRQENFKKRHRASRAKKNQESLVTSSST

>AtRWP-RK-1

MAGDDPKSSAPKDDGYEDPYINDPFDGFGPFTDEDLINVMADINPNLMDMSFTEHTPPSVLPTLPSD  
VDETHLFHELDLSISNYDSKDEFETLSFVEDGFTIPLDMFEQPNDEHNDNDVPGEIGNDNGKNVVG  
DSTRLELSTRVFGGANGLDFEIGGSATMPVPVTTTISDGVHACNCCRLRELVLHKEGEERSKLDIYGGI  
GFICHAILLIQLLAPDSMQRQPLIFHLQHLTMEEVKKFIEDYCYQRVANGLSLLQDTNAAFYQAMSAN  
SIFNQPPPMLTLPSSTDVPLSLLSPNEDHDVPLSLLSPEEALDIQPVPPHVELREPTTRLPKQREKRQTP  
LAAQVISLVSQFNI

>OsNLP1\* in 2005 (OsNLP2)

MEQKPSPPPPRSDEEEDGLMGCGMGGTGDIAGGDLDMEEFLLATPGFDLSEFWHPGAASPFSPFL  
DIGSSVTTLTPAPAAAGEDDRDEAEMPSRGGGGLEVSPAHRGWTFQTAPQEVAVEPTVKERLRRALE  
RIASQSQSQAQRGDGELLVQVWVPTRIGDRQVLTTGQPFWLDRRNQRLANYRTVSMKYQFSADE  
SARADLGLPGRVFVGRVPEWTPDVRYFSTEEYPRVQHAQYFDIRGSVALPVFEPRSRACLGVVELVMT  
TQKVNYSAEIENICNALKEVDLRSSDVSSDPRSKVVDASYRAIPEIMDVLRVCDTHNLPLAQTPWIPCI

CQAKRGSRHSDSEYKHCVSTVDEACYVRDCSVLGFHQACSEHHLFRGEGVVGRAFGTNEPCFSPDIT  
TYSKTQYPLSHHAKLFLGLRAAVAIQLRSVKTGSLDFVLEFFLPMKCINTEEQRAMLNLSNTIQQVCYT  
LRVVKPKELVNDGPFEISQPTRPEFYAKSVHEDLDELCSGINVPGRRTSLEASEEVSSWIASLVDAQNK  
GGKGEIDVDLPFGFSKQDDEGFSVTAGWHTSPVMAPDGSMSFGFRHEDYDVKENTC**SSDPSNSN**  
**SDKAV**EKRRTKTEKTVSLQDLRKHFAGSLKEAAKNLGVCP TTLKRICRQHGINRWPSRKIKKVGHSLLKK  
LQMVIDSVHGPETVQLSSLYENFTKTTWSERELQGDVHFPASEQNFQLEPSVPDRPCEGRFTSHTS  
GSNSISPPSCSQSSNSSLGCSSVPKTQQQHGSAPQLAVKEEISMDENQCSTLIKSASHAEAELQMFVEE  
RPTMLFRSQSVLLSEHKPIENMSNVQKARSDSLKIKAIYGEERCIFRLQPSWGFQRLKEEIVKRFGISQ  
DTHVDLKYLDDESEWVLLTCDADLLECIDVYKSSSNQTVRILVNPSIQPLLNASFGQTGLS

>OsNLP2\* in 2005 (**OsNLP6**)

MDMPTPSNRAGCNGNTGGTMGPSDDPYGAAAMNLDYSEIYSPSVADQLFSLNDPAAHRMFA  
MWPSMGSSPCAAGTSEDMPLDAYSGLGEAVEEPSQIMSVNPTEAEKTGKSSGELGSDDGAHQGSS  
MVPRSVVGSSLADRMLMALSLFRESLGSGALAQVWMPVEQEGHVVLSTCEQPFLDQVLAGYREVS  
RHFVFSAKEEPGLQPLGRVFISGVPEWTSSVLYNRPYLRMEHALHHEIRGSLAMPIYDPSKDDSCC  
AVFELVTRKEKPDFSAEMDNVCNALQAVNLKATKGSSNQKFYTENQKFAFTEILDVLRACHAHMLPL  
ALTWVPTSNIGIDGGYVVGKDGASFQSGKTIIRIHESACYVNDGKMQGFLQACARRHLEKGQGIAGR  
ALKSNLPFFSPDIREYSIEDYPLAHHARKFSLHAAVAIRLRSTYTGNDYILEFFLPVSCCKSGEQQMML  
NNLSSTMQRICKSLRTVYEAEDNVNAGTAAVFRKNNESCLPTGHTESSHGDQSITGASFEDTSLA  
NKPVGMEPELAEQVQPSSIGHAEKKRSTAEKNISLDVLRKYFSGSLKDAKSLGVCPTTLKRICRHHGIS  
RWPSRKINKVNRSLKKIQTVINSVHGVDRSLQYDPATGSLVPVSLPEKLTFPSCDGLPTPSVGKTVEE  
NSDLKSEEGCSLPDGSQRQSCQLQISDVKKSNEDEFHIGSGNSDFYGANATAKSNSEVTQGPLCPTG  
AFSALHLKGTDCNTPSSSLRPSSESTRNQIVGRNPSIQQEDLDMLDNHEAEDKDHMHPTSGMTD  
SSSGSASSHPTFKQNTRSALKDAASPALTVKATYNGD TVRFKFLPSMGWYHLLIEIAKRFKLPTGAYQ  
LKYKDDDEDEWVILANDSDLQECVDVLDSIGSRIVKLQVRDLPCIVSSSGSSTCLQLAAHSS

> OsNLP3\* in 2005 (**OsNLP1**)

MEVDPSSSLPGAGEGGGGGGGGGGDLWPFDSLTTSLFSSVSASPQPLPASSSSWLTPPSPLWLFD  
RQLPLDMGAPAAPATAPPAEAAA VVEEVHRTSRGNSD TTSKRVDQINSKWQFHLSIDDNTDSSCLF  
KERLTQALRYFKESTDQHLLVQVWAPVKSGDRYVLTTSQGQPFVLDQQSIGLLQYRAVSMMYMFSD  
GENAGELGLPGRVYKQKVPEWTPNVQYYSSTEYPRLNHAISYNVHGTVALPVFDPSPVQNCIAVVELI  
MTSKKINYAGEVDKVCKALEAVNLKSTEILDHPNVQICNEGRQSALVEILEILTVC EEHLPLAQTWV  
PCKYRSVLAHGGGVKKSLFDGSCMGEVCMSTSDVAFHVIDAHMWGFRDACVEHHLQKGQGV  
GKAFIYRRPCFSKDISQFCKLEYPLVHYARMFGLAGCFAICLQSMYTGDDDYILEFFLPNCRNEDDQ  
NALLSILARMKKCLRTLKVVGNGDTNEVCLQISNVLIETEDLKTNVHFENSEGCFRESPESNGSQRV  
HEVDNDGNKVSIMSERHLLADDNSQNNGASVGRPNGSGASDSLHKSNNKPPERRRGKAEKTISLDVL  
QQYFSGSLKNAAKSLGVCPTTMKRICRQHGISRWPSRKINKVNRSLSKLKQVIESVQGSDAAFNLTSIT  
GPLPIVGPSSDSQNLEKASPNKVAELSNLAVEGDRDSSLQKPIENDNLAILMSQQGFIDANNNLQLE  
ADKASHSRSSSGEGSINSRTSEASCHGSPANQTFVCKPIASTFAEPQLIPEAFTKEPFQEPALPLSRMLIE  
DSGSSKDLKNLFTSAVDQPFLARSSNLALMQNSGTVTIKASFKEDIVRFRFPCSGSVTALKDEVAKRLR  
MDVGMFDIKYLD DDHEWVKLACNADLEECMEISGSHVIRLLVSDVAAHLGSSCGSSG

>OsNLP4 (**OsNLP4**)

MEEGDPQPSISLARTPSEGAAAAVDLDLLEQLLSADNAWLEVAANTSRSPNFFATPSNCLTDASVAT  
TTPANSWWIQPSGASTSVRERFDQALAYIRETQSDADVLVQLWVPVKGNDGQLVLTTSQGQPF  
RSLNLIQFREVSTKYQFSADVAGSSPGLPGRVFIGRLPEWSPDVRYFTSYEYPRINHAQYLDVHGT  
MLPVSFERGNYSCLGVIELIMTKQKLNFTSELNTICSALQAVNLSTEVSSIPRAKLNSASYKDALPEILEV

LRAACITHKLPLAQTWVTCAQQGKGRSRHSDENYKYCISTIDAACYVNEPRMQSFHEACSEHHLLRG  
QGVAGKAFTTNQPCFLPDIGSSTKLEYPLSHHAKIFNLKGAVAIRLRCTRGTGIADFVLEFFLPTDCEVL  
EEQKAVLDSLSGMTMRVCQTLRVVTDKEMEDEAMREMNELNSFSPRGKNKVEELSFGDNTRGDREE  
ASWTTLVGTSQKGSDLAELHTHGMLSHGGHGSSQAGDQTSKEGSKVKRRTKTEKTVSLQVLRQYFA  
GSLKDAAKSLGVCPTTLKRICRQHGINRWPSRKIKKVDHSLRKLQQIIDS VHGAETAFLNTLYKDLTN  
TSVSSDNNLSG SVTVPLANQNNLDFEMHQHRLSSNIPSTSLSHSSCSQSSDSSPSCSGGATKHSPQ  
VGADQVRSGLCPQHSPVQTLQTEAASINEHFSGQEAPIDLLQDVAEKANGEQHMSQSPSSPKQTA  
NVGMRVKVTFGSEKVRFLKPECDFQELKQEISKRLSIADMNSLIVKYLDDDSEWVLMTCADLHECF  
HVYKLADIQTIKISVHLAASPTTRITIGHTGFS

>OsNLP5 (OsNLP6)

MDMLMLSSALDGLDSYTDLVAGSSVADSIFSALTCFPPSQERLLHVSTPVGSNSRQDDSDVSITKEGT  
TTRRGDCAAGLASGEPVAAGIGSVKPFDPVTLTERMLRALAMLKEASGGAILVQVWMPVRNGEQ  
HVLTTSDQPFLLDQKLTGYREVSQFTFSAEEGPGLFPLGRVFMMSGMPEWTSNVMYYHGSEYLRV  
DYARRHEVRGSLAMPVFNSSGGSCCAVLEVMTREKDNFCLEMVNVSNALQSVQLSTVNAWRHS  
QSYSRDQKLALMEIFDVLQAVCQAHLLPLALAWIPVCSKRDVLVSVEYGANFGKRNEVLCIEESACY  
VNDTRMRDFVQVCAEHLEKGGQGVAGNAYLSNNPFFSSDVKDYDMHAYPLVNHARKFGLHAAVA  
IRLQSTYTKNDYVLEFFLPVLCKGGGEQQLLLDSISATMRRVCKSLRTVSDAELKEDVTRKPSNENRS  
GTRCPSPVNLIIYSGREIDVSNETKNTPLEYQIEGIDEQLSDTKSTNKLIKCSNASDGEKRRSSTEKSVSL  
SVLQQYFSGSLKDAAKSIGVCPTTLKRICRQHGISRWPSRKIKKVNRSKKIQNVISSVHGVGVLKYDP  
STGCLVSSVSPSIEPVL MNVEHKGS DPLIESELPHLNFEPCDAYRREHAGQDVLHKLQNKQNGEIN  
FDMDDGELFRNSHSTRTLGAFCE DMPNGLYVAREMTCVAKTGTRTERLEHKPSSRDSFSAPQEYR  
MESETDKSNKNSKQSLPSSSSMTDCSTSSGETFKSIKSQSANESNKT VVKASYKNDTIRFKLLPSMKY  
EQLLEEIAKRLKLSIGLFQLKYKDDEGDWWILASDADLQECLEILD TTRLRLKLQVQDVVCPIGSSSGSC  
SMLRP

>OsNLP6 (OsNLP7)

MERVVGDFNLLLQRGGAAGERGSEGGGGGSPGTEEA AVAVKQRIARALRLYKEAAGDGGGGWM  
VQVWAPARDGARRVLATRGQPFV LASQCHRLFQYRTVSLTRVFPVGGAAAAD EQGLPARAFDATA  
PEWTPNVQCYGSGEYARISYALIYDIQGSLALPILDPDDASSPLAVLELVTTAPLLRVSGEVANL CNALR  
AVSLRGAGICNRAAECYSLAVNQIVHRDATRAAMA EVSELLITVCEAHKLPLAQTWVRCWSCGGGG  
EDTEKAALTTAGAPFH LAAGADARGFRDACVEHHLQRGQGLVGTAARAPGGGRLCADVARCSKDD  
YPLAHYAGMYGLAGCLVLRAELSAAAMADAAAATAGDEEDCVVLELFLPPDCTGVAEQKAAVDAVS  
ATIKQCSGNLKAIVISNLDDLFLDTMADGDHQLRHEMDDL GDDQRCSDEEDLQ LLENTNIGELNIHN  
ADQIRNEDPTSQVGKNKTKRGKAEKSVTLEELQKHFGSLKDAARSLGAGYSVDYLHQNPDVYAQIN  
TQPLKVGSPGSMASQGGHFARSARCGNGDGVVTIKASHRGDIIRFRVPCSAGVAAVKAVVAKRLSL  
DAGAFDVKYLDDDHEWVLLSCDA DFQECLDVVPALPSMSVTARSGSGAAAPVVRLMVQE VADNI  
GSSCASSD

>OsRKD1 in 2005 (OsRWP-RK1)

MCAAPMASTAQPQQQPPQQQEQQPVA AA AVPTPAPPASEAQPPQKPTRVLSYEEISKLFSLPIAEA  
ASILGVCTSVLKRICRSHGIVRWPYRKLVS GKS GDDTKNAEREKAKGLLEISKVAKQKALSASGLSTVSP  
GAFQGVAKSQQGSSKAGQVSPPGKQNVLGGSAILS YGTQTKGIPTYMDDFKYGFSSGLSLQTMKW  
WGTDSTHTETPAKDDNGEAPESANEASKGMTDDELDWGADEAEAEADADSAITTEPSAQLCSLRRK  
AVDDGRKLLTGKSCGGLELCRLNKRQKMALAQVFGASLPEQLRSKLG

>OsRKD3 2 in 2005 (OsRKD2)

MEMHECCYYGSGIGDWNPLAAIPPCSSSSSSWSSQLLLSDHDDVLLHSAGDHGGAVAGIGGA

CMTADLVVRDEEMEMAAGYLPVAASAAAAADVDHYMYQQFQLEPDQFVSTLPAVAVAVAATAG  
GGSHDDELLRMPFTDIDLDAFADARDVVVGVEPKPSPQHTLDAAIALPAVGGGGAAHHFGTQDDD  
VKFDVTKQRNDAALAGDDSLSMVIVESYEMGMRRHAAEQEQEQPKIITSAATTLTPLPLPPPPPPPP  
RVTRSRRDGSSAATAGGKTRLDHIGFEDLRRYFYMPITKAAREMNVGLTVLKKRCRELGVARWPHRK  
MKSLKSLILNEMGSKGMSAAAMRRELEALENCCALMERNPAVELTERTKKLRQACFKENYKRRRAAA  
VDVLDLDHCFSAAGHCHRRHHHQQALPPPPAAAAADHRRRDFFGY

>OsRKD4 in 2005 (OsRKD5)

MDAAAAAVSTLSALAVFASTLDHGAVRSVHGKYVYGRGGRRRWVEREFVLTASCREVPA  
PPRILPAEWRGRPAYREGQVVAAGAWRCILAFDSAAAPRTPPPVLSPLNPRLMCVPSLYNDLEKVF  
RFQNVKIPKLMQCDSEEKSSWDARDKSSDEVHASESDSDDDLQSGEEKPTVQKQRRANKKHIA  
ITLVDAIQYFHLPIREASRTLKIGVSILKRKCRQYNIPRWPHRKIKSLDSLIQDLEYVIDDGDHDDTGDD  
VQKEKHQTAEEKQEAIMALTRRKQMLETEKETIQIPAMD LKVETKQFREDVFKRRYRAKKDLAND

>OsRKD5

(OsRKD2)

MRHNRSLAALLRAGRYGAARRLFDALPARSVVTWNSLLAGLARRPDARAAREFFDAMPVRDAVSW  
NTLLAAYSASPHPDHLAAARRLFDEMPQRDVVTWNTLLGAYARRGLMDEARRLFDEMPQRNAAS  
WNTMTVGFFAAGQVVKALDVFDAKPSASLSTMVSGFTKNGMLHEAEELLTKRLSVTMDMDKAV  
DAYNTLIVAYGQAGRFSDAKRLFDMIPKGQYQHNMLKRKGFERNVVSWNSMMICYIKAGDVCSAR  
ALFNEMPDKDLVSWNTMISGYTQASDMKESEKLFWEMPDPTVSWNLIIQGMQKGEAEHARGFF  
DRMPERTISWNTMISGYEKNNGYISSVKLFSKMLEVGEIPDRHTFSSVLAACASIPMLGLGAQIHQLV  
EKSFPDPTAISNALITMYSRCGALNDAAEAFKQMHTKKDLVSWNALIGCYEHHGRATKALQLFKEMRR  
AKVMPTHITFVSLLSACVNAGLVSEGRMVFDTMVHEYGIVARIEHYAALVNLIGRHGQLDDALEVINS  
MPMAPDRSVWGAFLGACTAKKNEPLAQMAAKELSTINPDSSAPYVLIHNLHAHEGKWGSAAVVRE  
EMERQGIYKQPGYSWIDLEGKMHVFISGDTWHPNAQEIFSVLEDWQWHNPMSLEMNQLTQVKLIA  
KRNNQIMDKQATATKMHKATNIRHIYSKFVDEQQNTSWWPYCTSLWPDSYLLEEEALFSSLSFSPF  
HPQPVYSTVMQSNVLQDELGVIFEDDVLYWDEMEQSENKVEKSEKGLPLLYYGDENGAASKIMRD  
DVRSEEKALTFELVSQYFYMPITQAARELNVGLTLLKKKCRELGIPRWPHRKMKSQT LINNVQVLQEA  
SKANNEEQLRMLVEMLQEERRLLEQKPYVQLEEKTKRLRQACFKANYKKRRLLALEAGEP

>OsRKD6

(OsRKD2)

MEKWRFYGGHQFQSYSFHEEENLFQDWSLDYLLGDEPFFTHHFSTSVHSNFVQDELYTLFDGDILS  
IWGDMKEDAYHRSDKDGGEEKELDHEKAMELQLQRLPSGRQSSEKTLTFELVSQYFCLPIKQAAQE  
LNVGLTLLKRRRCRVLGIPRWPHRKVKSLIETIKNVQELGMETGQDEDNTRNAVEMLQQTKKLIEQSPD  
AKLDDWTKMLRQACFKENYKRRRLAIEG

>OsRKD7 (无)

MAMSRATCSTRPRISRCSPSRRWFVPVAAAIESHPTPAIHVVEREWPAQVQISRFDPCSPPPPARMLP  
GGQQQQPHAPGGDLRSDEIHALKQRRRPPNPQSSSPPEGLLGAANPDRPDDDELDAISSFRDE  
AAHGDSGGGVARVQVLPVEQDANLVPSPLRHGQLDCSRCHLVHRHVMHVAVLPYVKFSLKLWEE  
AFHRIRRMYSVRSNVYSLSKWTQEWASEFIARNIDTMRNNTNGQLDSGYSNLVESVRTNVNVP  
TAVEVNLLQTIMSAPSADHHQNAADQVAAPAAQPFSAAPPVALPPKAAPRKARKDRDYASMLVAV  
EEFYVAATSRPVPNSDVEILESSHVSQQQDGGRAIYPSLQARRGKTKQEVPRRNAKDVLEYLSLARKE  
TEKEINTLSSFDGIYRNDGTLSYLMTEVRRNRKIWRQLQKNAPSTLSSRLASVKEIDDIKVEKGRLYAQF  
ISALKKLCRKKMDDGGSAPSANN

>OsRKD8 (OsRWP-RK2)

MAGDGGNGAADGGGEHLELDFPSPLLDNFDVLELLDLSVLGDVDDDGAPPAPAPVQMSVDGAG  
GGRINKPGSSVDDLVDWSTAFGNNCSKIDGEYGGASTSSSAAPALAPPQEDYCSGCQVLEVVHNS

GLEITKLCIHGGVASGEFYHAILDVYRVASAPAPALAHHSIINFRGRGYDWVKQYLTEYALRRAGGGF  
AVVQDSLSAFHDALCTTMAPCSSHVGDHRRASSSAAAAAEERTNGNGDHGQLVHNAAVLP  
MLESSRCLVAADQAATTNNNGSGDRRLVLDTTAIQPPASGCILHMAFPSKSYQSSRPTTLPSRYQE  
CTCNPVAYEMDGVRSSLAPICWPELLGYNVNREKTKQLQLSDIAPYFELPIAKAAKKLDICATALKGIC  
RKHGVLRWPYRKVRSIDRQIATLRRSGNGDATRNEIETLIASRRRIVAGLDQ

>OsRKD9 (OsRWP-RK2)

MATGGSSSSSNVPSGGAAGGGAGSGKLPMPVPGSIECLRKRQRQLRVLIHVNDHRKAVVVLHAGED  
GKPDHVLVQNVSPEGEASVQSTYRIDVSGETPESQAEMLNDWYTSFRMDTTGVLYDSDQNVYGV  
RGHPGGDVPRSLAILPPAPKKNQHGKAPATESNSSLVEEPLLLVQTDQPAAGKRKKFTFPDQKRKVK  
TMTKKDLESYFHTQKSAAHIGLSIGTTALKNLCRANDLPRWPYRQIASLDNKFNNNLKKQITGWNLG  
KAVQGVTKAFKLRKEEFYQKIMSSMPEQLQSIDEIVNSLPEADDDIDIEDDEDNDDVIEDNDDDNS  
DEN

>OsRKD10 (无)

MAGEHRFYDSNGDVSRYMLDDMEFLPLFGAEAATTLPLVLPDVEPLPTAPAPAATAHVEPAPAAD  
FGLGNPVLADLGFVDLDFPELNFQSPPPPAMNAGGYTHQVQASPPVMHHQQQQQQLAPLPL  
AAHGFAQQPAPATTMAPSGDDGLFLAAPSRDAPCSPVMFNFMDFNVDMGDVDMDDVLMWA  
DQDTHGAAAGGDTAPPVVVDEYADFVPFQAGDLDCSNCHLVREMMHANASRTIYFLVHATGVGS  
FQHAIVDRRYTATGAEGLHFPGRQLLYFDLTNHTIESASDFIASNVEKLKNDTTGHHFLDTGYNFSGA  
VRTDMANSHTAMEMNMLHTIVSAPFENVTTDAASPPAAQFIGAPPAAELPAPVPAPAPPAHEQN  
AVVATLLFKVEEFYAAANSRPAAKRADVKILESSQVTQQAGGSSAATATMYPSPMVDRKRKRAQATPS  
RMAPHEVIQYLRATAVETDKELETNNFFKVCDEGDKALITFSVEQIRSIKKIGRIINKPVTAMSSRRM  
ARFIDEIDTIKEEKARVFEEIKILKNPRRKRENDGSSGSNRKNVGGSSGGKKKT VGGSSGSKKNVGRP  
SAKKAQK

>MeNLP1

MPEQEDDKSKENQTVGGDKGETLMDLDLDTSWPLDQISYLSNPLSPLLLSSSDQPCSPLWAFSDA  
DDRLLPVSSASHATTPPLRFSDYPIFLACAPNSVAENHTENDDKRKFPSPLLGLMPFDNPDGYCVIKE  
RMTLALRKFKESTE QHVLAQVWAPT KNNGRYVLTTSQGPFVIDPHSNGLHQYRMVSLMYMFSVDG  
DCEGELGLPGRVFRQKLPEWTPNVQYYSSKEYSRRDHALHYNVQGTALPVPFEPFGQSCVGVLELIM  
TSQKINYGPEVNKVCKALEAVNLRSSSEILDHPSTQICNEGRRNALAEILEILTVVCETHKLALAQTWVPC  
MHRSVLAFDGGGLKKSCTSF DGSCNGQVCMSTTDVAFYVVDPHMWGFREACLEHHLQKGQGVAGR  
AFLSHNACFCPDITQFCKTEYPLVHYARMFGLSGSFAICLRSSYTGNDNYVLEFFWPLSISDNYEQNAL  
LGSLVATMKQHFQSLKVASGMDLEEEGFVEIIQTSMGRDLRLECIRIPQSPKSPNLTSPKEGKT  
AQLDPLKHLMVNLDAVDNNGNISQAEGSHFPTSLPENKGNKKPSEKRGKTEKSISLEV LQQYFAG  
SLKDAAKSLGVCPTTMKRICRQHGISRWPSRKINKVNRSLSKLRVIESVQGAEGA FDLTPLTSPLPVT  
GSIWPSNLNGCNQQNSLNSKSLEPIDEKNGSPICNAAGNDGQGGGEAQLLGGRILSREEAVLQNG  
FSPKIGLVSDRFKAGNASGEESTGTPTSHGSCQGSPANDSAPANDSPVSPVHEKCKNAGNTPELAFQ  
TKGKLNLSAAYSVPDALVATEAQAPLGEMLIKDAGSSKDLRNLCPVADTILEERVPESSWTNYPGPD  
FPTTEAVA ALEHAMTQGTTRQEMMTITIKAAYREDIIRFRISLSSGIVELKEEVAKRLKLEVGTFDIKY LDD  
DHEWVLIACDADLQECIDISRSSGSSIIRLSVHDVNTNLGSSCESNGEL

>MeNLP2

MAEQEDDKSKDNQSVAGNKGETLMDLDLDTSWPLDQIYFLSNPLSPLLLSSSDQPCSPLWAFSD  
ADDERLAASSSSHATHPLRLSDYPIFLTCNPSSLAESQTENDDKRKLPSPLGLMPFDNPDGYCIIKER  
MTQALRNFKESTE QHVLAQIWAPVKN GARYVLTTSQGPFVIDPHSNGLHQYRMVSLTYIFSLDGEFE  
CEPGLPGRVFRQKLPEWTPNVQYYSSKEYSRRDHALHYNVQGTALPVPFEPGQSCVGVIELIMTSQK

INYGPEVDKVCKALKAVNLKSSEILDHPSTQICNEGRKNALAEILEILTVVCETHKLALAQTWIPCMHRS  
VLAFGGGLKKSCTSFDCGSCNGQVCMSTTDVAFYVVDPHMWGFRASLEHHLQKGQGVTFRAFLSH  
NACFCPDITQFCKTEYPLVHYARMFGLTGCFACILRSSHTGDDEYILEFFLPPGISDVFQQKALLGSLLA  
TMKQHFQSLKVASGMDLEEEEGFVEIIQTSVSGKLDLRLECIQTPESPESLPNVNTSPKEGQMAQVDP  
VVNLDVVNNGGSTGDAEGGHFPTSPPENKGNKKPSEKRGKTEKTISLEVLQQYFSGSLKDAAKSLG  
VCPTTMKRICRQHGISRWPSRKINKVNRSLSKLRVIESVQGAEGTFDLTPIATSPLPVAFGSISWPSNL  
NGCNQQNSPNSRSSEPNNERNGFPICKVAGSEEQSGSENQLPGGRVISHEELFLQNCFSPEIGQGSS  
RHKAGNVSREESAGTPTSHGSCQGS LANDIAPAKVASASPVQEQGNEVGTIPELSFQPKGKPNLSAL  
YPIPDADFVATEAQAPFRERLIEDAGSSKDLRNLCPVADTMLEERVPEYSWTNHPGPEFPTKQSM AAL  
EHATPRVTARQEMRFVTIKATYREDIIRFRISVSGSITELKEEVAKRVKLEVGSFDIKYLDDDEHWVLIAC  
DADLHECIDISRLSGGNIIRLSIHDVNTNLGSSCESNGELLGCTYGV

>MeNLP3

MLGTRADSAMDFDCMDKLLLEGCWLETIDGSEFFNPSPFSSAAFVDASFQWPTSEINNCDLASSPSK  
RSNREEEQISLLPRNSALNEAHGRSLINAEALDHGVGSADRLGYNTTEGSEVSRRWWIGPRTNPGPKT  
SVRDRLRALGYIREFTKDKDVLIQIWWPVDKGGRRVLTTHDQRFALVPNCQRLANYRDISTNYQFSVE  
EDSKDMVGLPGRVFLGKVPEWTPDVQFFRSDEYPRVDHAQQYDVRGTLALPVFEQGSSTCLGVIEV  
VTTKQKIKYHPELESVCMALKAVDLQSSEVPSLQHVKMCDMSYQAVLPEIHEVLRSAETHKLPLAQT  
WVPCIQQGKGGRHSDNNYYRCVSTIDLACYVHDTGVQAFHEACSEHLLKGQGVAGEAFLTNQP  
CFSSDITSYRKTEYPLSHHARMFGLHAAVAIRLSLHSGAADFVLEFFLPAYCTDPEKQKEMLTSLSITV  
QQVCQSLRVVTDKELEETGCPISSELLASSVDTPPKEEMLVTQPYSVSYGGESLSHADRLTGIQQSGSV  
VSSCQKKKQKVLQDQISVDCWQNQEDYSLKVSVESGGDSAVAEGSFSSVFKGKKGEKRRRTKAEKSITL  
QVLQRYFAGSLKDAAKSIGVCPTTLKRICRQHGIKRWPSRKIKKVGHSLQKLQLVIDSVQGASGSFQIG  
SFYTNFPELASPNLSRSLNFSTLQSDHPEPSSIQSERVFSSQAATPKSPSSSCSQSSNSSHCISSTQL  
HASAVTPTSEDVPLGENSDNCVLKRARSDAELRASIQEQNLLPRSQSQSLGEQPNLGNLLPLPNN  
SSSILRDFDTQRVKVITYGNEKIRFRMPNNWELKDLLQEIARRFNIDDIHKYELKYLDDESEWVLLTCDD  
DLEECIDVCQSSQTHTIKFLQVSPHLFDRSMNSRGLS

>MeNLP4

MDHGASALNSTVWTFSSTTMDLDVMDKPLSQGYCLENNDRANSLEPEPFTSHVLYDHSEYSSFSED  
LYHQIYRKEMKPLFENIPSAYHIGEGAETAKEFSVQSESFTLEGSSNSGSRWLIDPSYSVKQRLMLAIKYLKE  
YVEDSDVLIQIWWPTQIGGQNVLTIDQPYSLNPSCKSLASYRNVSKTFQLTAEENLKELAGLPGRVFL  
GKLPEWTPDVRFFRSDECPKRSYAKMYNISGCLALPVFEQDNGVCLAVVEIVTTTQKISYSLEIVGRA  
LEAVDLKSSQDFPLGIKACNESYQISILEISDILQFVCKTHGLPLAMTWALRDRQGEVEHWQFSKKYD  
YCLSTVDSACYVADSLLGFHEACSEHYLFNPQGIVGKAFTTKQWFATDITSFSKANYPLSHHARMF  
NLRAALAVPLCNIYTGLIEFVLELFFPWDCDIEEQKHFWDMLSIVMQQACKSFHVVDKEIDEEVSEQ  
MVVASDGRYNREGIQELVASPSNESSQEESSTPHEMDSQNKDKFSFISWECPEKELEDEFKIVITHWE  
NDEMGLYQEPVFSDFQKATQSSMPKPGVDIAENFSNGRHCSSESSEKASDKRQTKIEKTITLQILRQYF  
AGSLKDAAKSIGVCPTTLKRICRQHGINRWPSRKIKKVDHSLRKLQLIVNSIHGAELIQIDSFYKSFPEL  
SSSKFSGNDPFSSSRMSENSCILKPQPRSRFSPKGVKPKSRSSSCSQNSGSTDEEKRLTTINGLNTGCS  
LAIDDPVLMMLKKAYSKPELHNLNQEEKEPKVLKSSLSHKT LHGNTTGHSLQDGMVFRVKATFGEENIR  
FSFLPNWDFRDLQQEIAKRFKIDDFSRIDLKYLDIDQEPVLLTCDADLEECIDLLRLSQCNTIKISLHQAS  
KSNLGSSFRIGLGF

>MeNLP5

MEDGGFKTDSVSRNLPGAAMDLD FMDellyDGCWLTTDGLNISQPGLSSSTVPNDSSQYFPFVDTN  
LHQQINQDGMENNFPENPPLSNPKVEQLADDESQDHKSVKITTSSVSAGFPNEGSELSRSFWIEPRA

DPGPTSSVKVRLMHAIRRLKECTKDREVLVQIWVPTKKEGKHVLTITTDQPCFVSLKSESLARYRYVSEN  
YHFPVEGDSKESLGLPGRVFLGKLPESTPDVRRFRNDEYPRKTYAKQYNISGSLAVPVFERGTGTCLGV  
VEVITTRYINYRSELETICKALEAFDLRSSQDFCPPSVKACKEFCQAAVPEISEILGSVCETHKLPLALTW  
ARCFQQGKGGCRHFDEKFANCISTVDSACFVDDRECLVFHAACSEQFLSLGQGIVGRAVFTNKQCF  
ASDVTAFSKTDYPLSHHAKVLGLHAAVAIPLRSTHDGSADFLVLELFLPKDCRDPEEHKQMQELLPIAIQ  
QACRSLQVVMCKELEASSLNEPYPLGSSWFAQMLEAQQKGKRVCSWDNPEEPKEEFKVATHWDE  
GLEKLYEGQVFAESGQLQQNSGRKDESTEGGNSSFAGQQSLGSRKTGEKRRTKTEKTISLEVLRYFA  
GSLKDAAKSIGVCPTTLKRICRQHGISRWPSRKLKKKTFINDE

>MeNLP6

MENLFSLKEKGKYWTSPRAQADGMAPSDGGAKNSISEDIFNSFSEFMNFDTYAGWCTSPSATDQ  
MFASYGSSSFQSTPYSTFDALSFAEQSCLTSLVGGNALNAAGTSYSSGDKMAVQQVNVYASDLMDA  
DDLCAKERTGAQRQIEEMANCMISRPVGFSLDEKMLRALSLLRESADGGILAQVWVPMRRGDQYILT  
TFEQPYLLDQSLAGYREVSRTYTFSAEVTPLPLGLPGRVFISRVPEWTSSVVYYSIAEYLRGQHARNHK  
VQGSIALPIFEPDNVCCAVLELVTVKEKPNFSEMENVRLALQAVNLRSTAPPQLLPQSLSRNQRAA  
LAEITDVLRAVCHAHSLPLALTWIPCHYMEEAFDEVMKVRVREGNSRSSGKFLCIERTACYVNDREM  
QGFVHACSEHYIEEGQGIAGKALQSNHPFFSDVKAYDITKYPLVHHARKYGLNAAVAIRLRSTYTG  
DDYILEFFLPVNMKGSSSEQQLLLNNLSGTMQRICKSLRTVSDAELKGGECSAVDFQKGAISSFPPLSV  
SITSSQTTSSEAVLNLTDKVPLDASSKYDAMKSDGPHEQSFNASRRQPEKKRSTAEKNVSLGLVQYQY  
FSGSLKDAAKSIGVCPTTLKRICRQHGISRWPSRKINKVNRSLKKIQTVLDSVQGVGGLKFDPTTGGF  
VAAGSIVQEFDSQRIFLSPDKNLPARNSSQSAATEEAVSPVPCIDGSNSAVKVEEDEFCDTCEVLM  
KSSIPVIDCEDSKSIATDAEICQKGRGCGPWAAMDNASAFAGTKGSLNSGSAKVDNSDTHFVSR  
SSCSLGAAEVLDTKEEGDDVMVEHNQPTCSSMTESSNGSGSMIHGSASSSPSFEKHKLKVCDDGGS  
KISVKATYREDTVRFKFEPSAGCFQLYEEVAKRFLQNGTFQLKYLDDEEEWVMLVTDSDLQECIEILDY  
VGKRSVKFLVRDSVFTMGSSGSSNCFLLGSS

>MeNLP7

MEDHILSPGTMMLGAHADSTMDFDYMDKLLLEGFRLESIDGSEFFNPSSSSSAACVDSSFLWPASEIS  
NGNFASSRSNQEDEHILLPRIAPPNEAHGRSLVTAQAHGEDIGSAYRLGDNTVDGSEVSRRWWIGPR  
TSPGSKTSVRDLRILALGYIKDFTKDNILIQIWVPVDKGGRRVLTTHDQCFALVPNCQRLANYRHVSI  
NYQFLAEEDSKHVMGLPGRVFLGKVPWTPDVRRFRSDEYPRVHDAQLCDVRGTLALPVFEQGSRT  
CLGVIEVVMTKQKIKYHPELERICKALEAVNLQSSEVPSLQHVACDTSYQAVLPEIHEVLKSACETHKL  
PLAQTWVPCIQQGKGGSRHSDENYYRCVSTVDHACYVRDSGVQAFQEACSEHLLKGQGVAGEAF  
LTNQPCFTSDLTSYGKTEYPLSHHARMFGLHAAVAIRLRVHTGTADFVLEFFLPADCKDPEEQKKML  
TSLSIHQEVQCQLRVVTDKELEEENDLPSEVLALSYGTPPEEMFRVTQPYSESYHGDNLWSDSFPGI  
QQSGSAVSSFQIEKQKLLIHEKSVDCRQTQEDYSPKVSVEYGGDSAIAEGSFSSVCVSKTGEKRRTKGE  
KTITLQVLRQYFAGSLKDAAKSIGVCPTTLKRICRQHGIKRWPSRKIKKVGHSRLKLQVVIDSVQGASG  
AFQIDSFYTKFPELASPNLSRSTPLSTSKQLGHPSSSIQPEGGIFSSQVAAPKSPSSSSSSSSSHCCS  
SGTEQHASTLTIPTCKDLMLGENSGNCVLKGVKSDAELHVSQEEQNLLPRSQSQKSLWEQPNLGNL  
PPLAKSSNRICQEIDGQRVKVTYGNKIRFRMPNPNWELKDLLQEIARRFNIDDIHKYDLKYLDLDDSEW  
VLLTCDDLEECIDLCQSSQSHTIKLLLQISPHLLDRSTNSRGLS

>MeRKD1

TKDNERKRSAPLEEEIRKHFDVPITKEAKEMKVGLTILKKRSRELKIMRWPHRKIRSLKSLINNIKEMGLT  
NEIMMLEEHQRLLEKKPDMEFSETTKLRQAIFKANYKKKRCLVAHHI

>MeRKD2

MDFSQDYSLTALRIFQNTINREFIRSLHVYRLKDGTDEKEREFLFSDDGPYVEMVANPLRLDRFRVLE

LFEGQVIGVWHCIFAFAHNAHHSPHLSRIPSLLSISRNPKLKSVPTLANDLQLIFKLISRTADEEPLQFLSEEK  
CRMIKGCFQSKRNLPVLDQDLNCLPYSVATSQVPKSQQIEPSEPASVMAKKKKRAATEDIARIALEDL  
VKYFDLPFAEASRNLVGLTVLKRKCREFGIPRWPHRRIKSLDSLIRNLQEEAERQKQENEDAAMAVAK  
RQKMLEREKESIERKPFMEIQSETKRFRQDVFKRRHRARALKTQGLRVSQASA

>MeRKD3

MDSKITVELMNFKNDDTDCFLMDEYFERLSELSPLESFLEFDSLSPYDTNFGFEDYLLENGHPLSWDV  
DIPIDAKPLRVFTSTIDNTVKYDDDFGTSSNEEEKRVIMGRKRSAPLEMEEIRKHFDKPITKAAKEMKV  
GLTVLKKRCRELSIMRWPHRRIKSLSLIRNVKEKGLTNEAVMLEEHQRLLKMPDMELNDSTKKLRQ  
AIFKDNYYKKRRCLEAHA

>MeRKD4

MADPRYVVPYHDPHDSPINYEILNFLRDANPTLENLPSTDEPTSLHVSSDDIVNPNLSLEDPMIWDIV  
NQPNSSGGQSQGEGPSLNRERRATENLEQRYLDDGKPISVWPPPAMPFQCTCCQVLREIHTDGNCT  
TKLEIHGRGLIICHAVLEIKDQVMYEAQQADQTEGGNEAERGSRSTLAQQRERTGRLTLKDFEAYFHL  
PIEEAAKIMNLCPTVVKKICRRYGMTRWPHRRIKSIQRQISNLRANSNWNDPGERARAQAEIQRLEVEI  
SNICSGVTN

>MeRKD5

MGLTLLKKRCRELGIRRWPHRKLMSLQTLIKNVQEMKKVEGKESEEKLEAIEILESERKMLEEIPDLQLE  
HKTkRLRQACFKSNYKKRKLMMMSRPSSSSGAIDYYGQINEDDEEIKSLLADPVCHPTMMF

>MeRKD6

MANWQNELATQESFLAAYPLIESFVPDPFCASLEIENSTIHGDQDVNGLGDWNEFSTLFDPPQKQLLL  
SCDSARGSSRTEPFEEKKAKKCREEKVNNISKALSRQTISMYFYMPITQAAKELNVGLTLLKKRCREL  
GIRRWPHRKLMSLQTLIKNVQEMKKVEGEESEKKLEAIEILERERKMVEETPDMQLENKTKRLRQACF  
KANYKKRRLMG MIDKPSSSSSSTITNKMMNEDEENIEEYEEIISLLADPTSHTNMLF
